# Supplementary material for: Inhibiting tumor necrosis factor-alpha diminishes desmoplasia and inflammation to overcome chemoresistance in pancreatic ductal adenocarcinoma
Source: PubMed Central journal article supplement (PMC5348380; doi:10.18632/oncotarget.13212), 2016-11-08
Supplement: oncotarget-07-81110-s001.pdf [file oncotarget-07-81110-s001.pdf]

## Inhibiting tumor necrosis factor-alpha diminishes desmoplasia and inflammation to overcome chemoresistance in pancreatic ductal adenocarcinoma

### Supplementary Materials

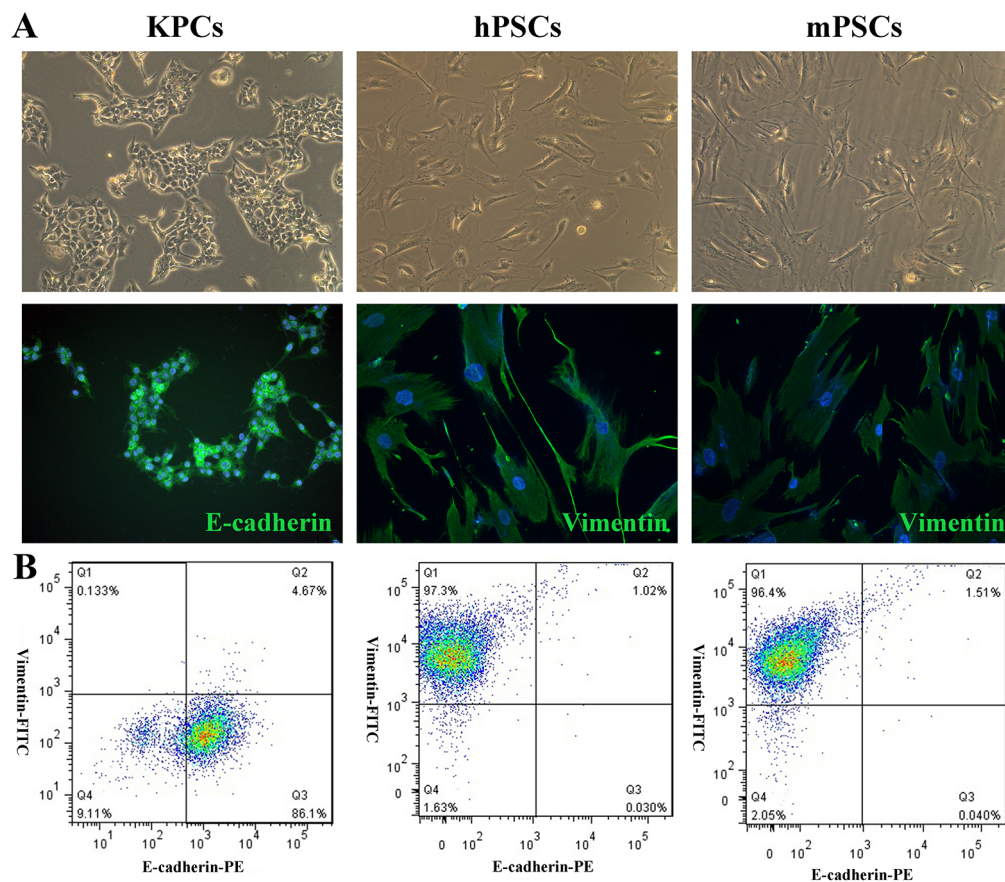

**Supplementary Figure S1: Primary cell lines were identified by morphology and molecular markers.** (A) Morphology of primary cell lines KPCs, hPSCs, and mPSCs. KPCs was stained by epithelia cell marker E-cadherin. hPSCs and mPSCs were stained by fibroblasts marker vimentin. (B) KPCs, hPSCs, and mPSCs were stained by both E-cadherin and vimentin. FACS analysis showed KPCs were E-cadherin positive only while hPSCs and mPSCs were vimentin positive only.

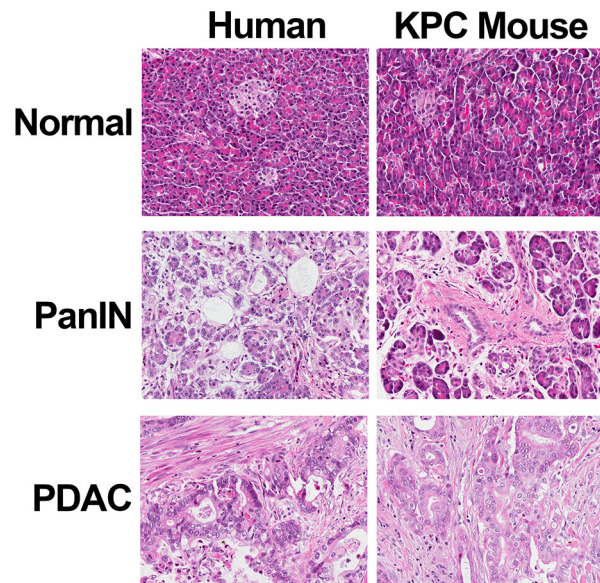

**Supplementary Figure S2: HE staining of different pancreatic lesions.** The HE staining of both human and KPC mouse normal, PanIN, and PDAC tissues were performed to show histological features.

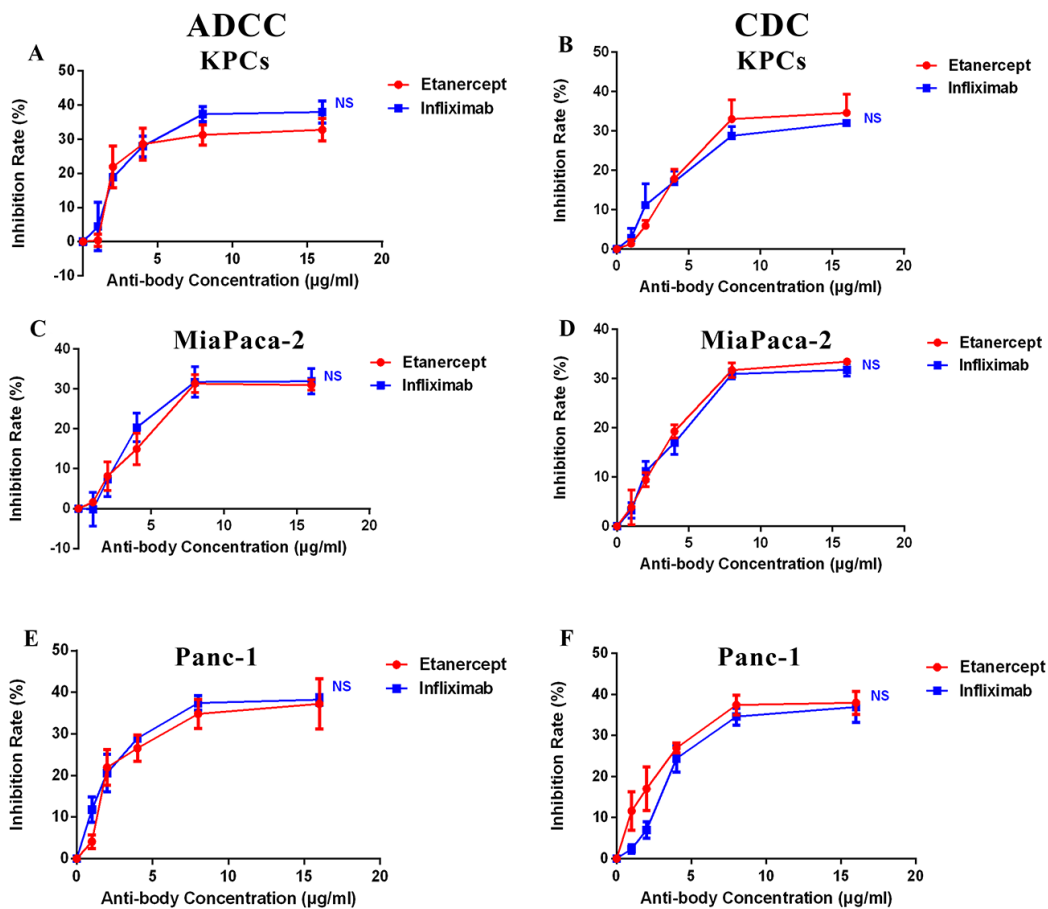

**Supplementary Figure S3: Anti-TNF- $\alpha$  treatments induced ADCC and CDC effects to inhibit PDAC tumor cells' viability.** (A–B) Cell viability of KPCs was reduced by ADCC and CDC effects induced by anti-TNF- $\alpha$  treatments. (C–D) Cell viability of MiaPaca-2 was reduced by ADCC and CDC effects induced by anti-TNF- $\alpha$  treatments. (E–F) Cell viability of Panc-1 was reduced by ADCC and CDC effects induced by anti-TNF- $\alpha$  treatments.

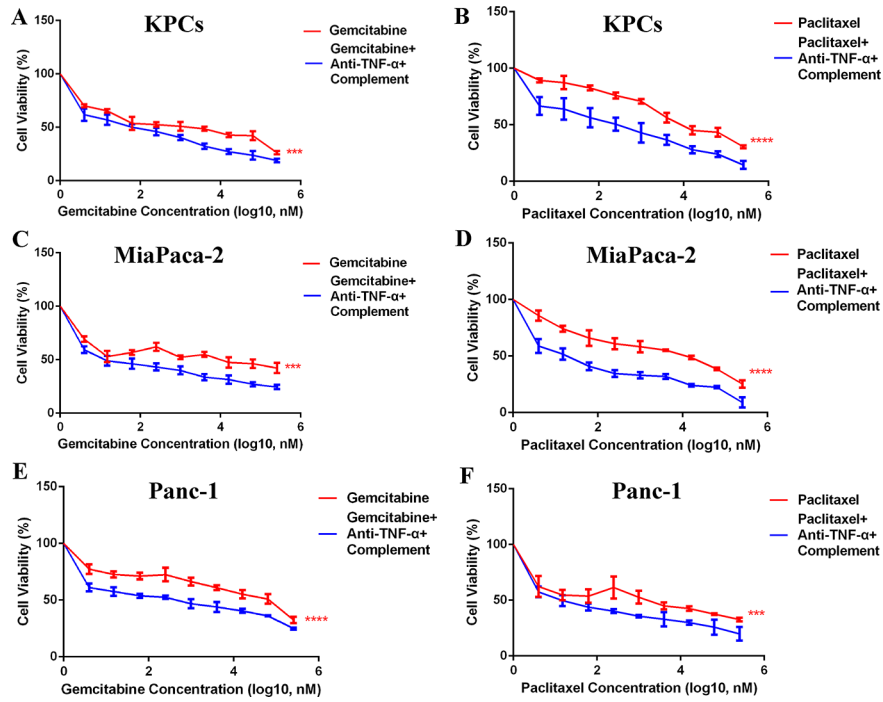

**Supplementary Figure S4: Anti-TNF- $\alpha$  treatments partially overcame chemoresistance of PDAC tumor cells. (A–B)** Anti-TNF- $\alpha$  treatment overcame KPCs gemcitabine and paclitaxel resistance via CDC effects. **(C–D)** Anti-TNF- $\alpha$  treatment overcame MiaPaca-2 cells gemcitabine and paclitaxel resistance via CDC effects. **(E–F)** Anti-TNF- $\alpha$  treatment overcame Panc-1 cells gemcitabine and paclitaxel resistance via CDC effects. (\* $P < 0.05$ ; \*\* $P < 0.01$ )

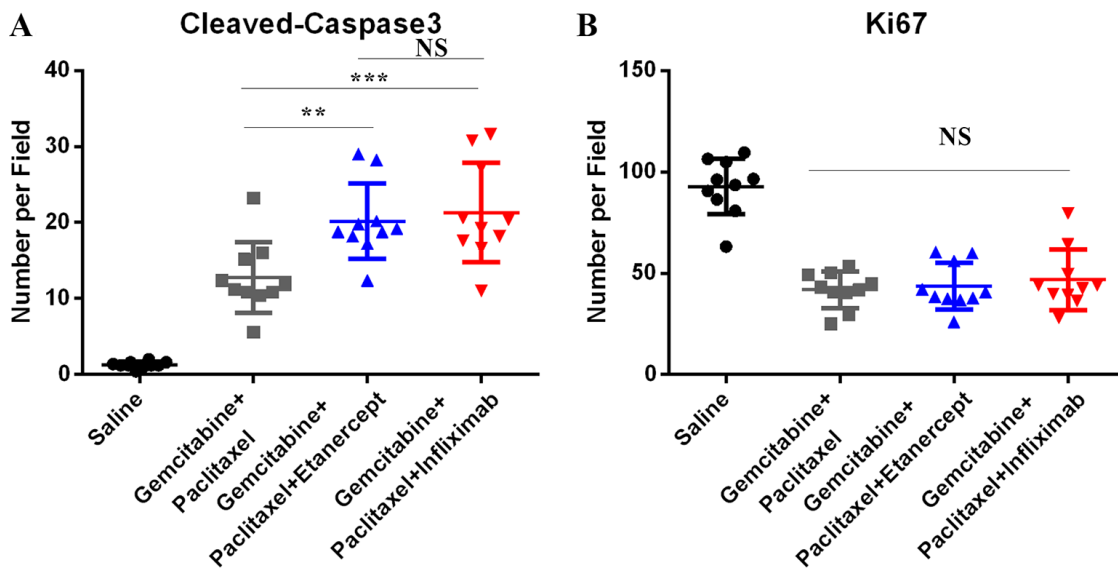

**Supplementary Figure S5: Quantification of cleaved-Caspase-3 and Ki-67 expression in xenograft PDAC mouse model. (A)** Compare with chemotherapy alone, combination of anti-TNF- $\alpha$  treatments with chemotherapy increased number of cleaved-Caspase-3 positive cells in xenograft tumors. **(B)** Combination of anti-TNF- $\alpha$  treatments with chemotherapy didn't further inhibit cell proliferation compared with chemotherapy alone in xenograft tumors. (\* $P < 0.05$ ; \*\* $P < 0.01$ )

**Supplementary Table S1: Correlations between TNF- $\alpha$  expression and clinicopathological parameters of pancreatic cancer**

| Parameters                  | N  | TNF- $\alpha$ Expression |          | P-value |
|-----------------------------|----|--------------------------|----------|---------|
|                             |    | Low (%)                  | High (%) |         |
| <b>Age</b>                  |    |                          |          |         |
| < 62                        | 56 | 27                       | 29       | 0.155   |
| $\geq$ 62                   | 44 | 15                       | 29       |         |
| <b>Gender</b>               |    |                          |          |         |
| Male                        | 63 | 23                       | 40       | 0.147   |
| Female                      | 37 | 19                       | 18       |         |
| <b>T Stage</b>              |    |                          |          |         |
| T1 + T2                     | 52 | 26                       | 26       | 0.109   |
| T3 + T4                     | 47 | 16                       | 31       |         |
| <b>Lymph node status</b>    |    |                          |          |         |
| Negative                    | 54 | 27                       | 27       | 0.176   |
| Positive                    | 39 | 14                       | 25       |         |
| <b>Metastasis</b>           |    |                          |          |         |
| Negative                    | 98 | 41                       | 57       | 0.817   |
| Positive                    | 2  | 1                        | 1        |         |
| <b>TNM Stage</b>            |    |                          |          |         |
| I + II                      | 78 | 35                       | 43       | 0.229   |
| III + IV                    | 20 | 6                        | 14       |         |
| <b>Pathological Grade</b>   |    |                          |          |         |
| Low and Medium              | 68 | 32                       | 36       | 0.135   |
| High                        | 32 | 10                       | 22       |         |
| <b>Pathological Type</b>    |    |                          |          |         |
| Ductal Adenocarcinoma       | 91 | 37                       | 54       | 0.388   |
| Others                      | 9  | 5                        | 4        |         |
| <b>Chronic Pancreatitis</b> |    |                          |          |         |
| Yes                         | 31 | 12                       | 19       | 0.827   |
| No                          | 69 | 30                       | 39       |         |
| <b>Survival Time</b>        |    |                          |          |         |
| $\leq$ 10 months            | 51 | 17                       | 34       | 0.073   |
| $>$ 10 months               | 49 | 25                       | 24       |         |

**Supplementary Table S2: IC50 dose of different PDAC cell lines**

| <b>Cell line</b> | <b>Gemcitabine IC50 (nM)</b> | <b>Paclitaxel IC50 (nM)</b> |
|------------------|------------------------------|-----------------------------|
| KPCs             | 5983                         | 1230                        |
| MiaPaca-2        | 789                          | 503                         |
| Panc-1           | 8765                         | 1988                        |
